# Supplementary figures and images for: Bifidelity Surrogate Modelling: Showcasing the Need for New Test Instances
Source: Atypon-hosted journal article supplement (doi:10.1287/ijoc.2022.1217), 2022-08-09

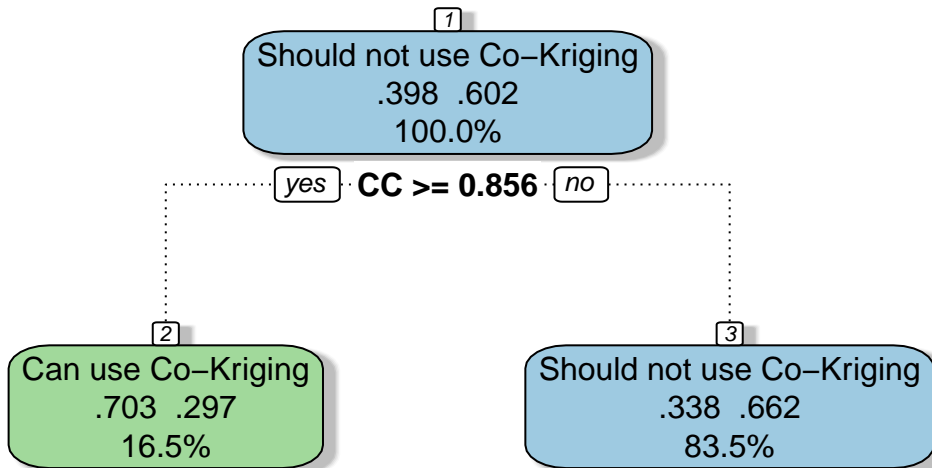

Supplement: ijoc.2022.1217.cd.zip [file augmentedTestSuite_(1)-CC_only-minPercentage0.05-default-cp0.pdf › 2021.0299-master/data/plots/predictionPlots/augmentedTestSuite_(1)-CC_only-minPercentage0.05-default-cp0.pdf]

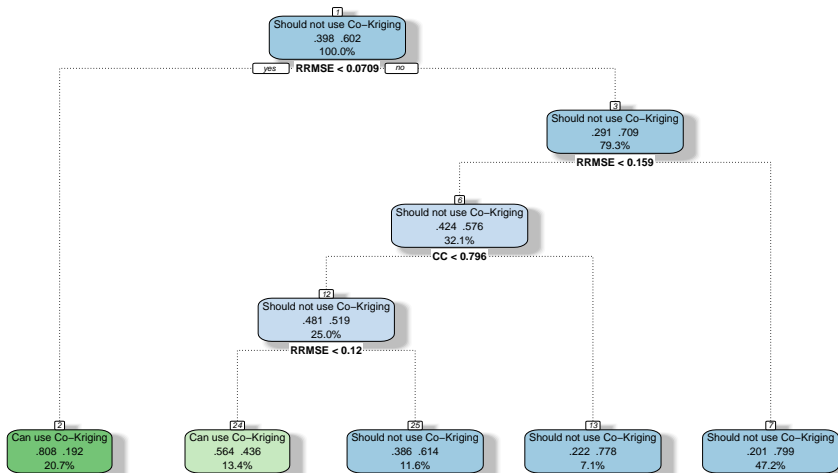

Supplement: ijoc.2022.1217.cd.zip [file augmentedTestSuite_(2)-literatureFeatures-minPercentage0.05-default-cp0.pdf › 2021.0299-master/data/plots/predictionPlots/augmentedTestSuite_(2)-literatureFeatures-minPercentage0.05-default-cp0.pdf]

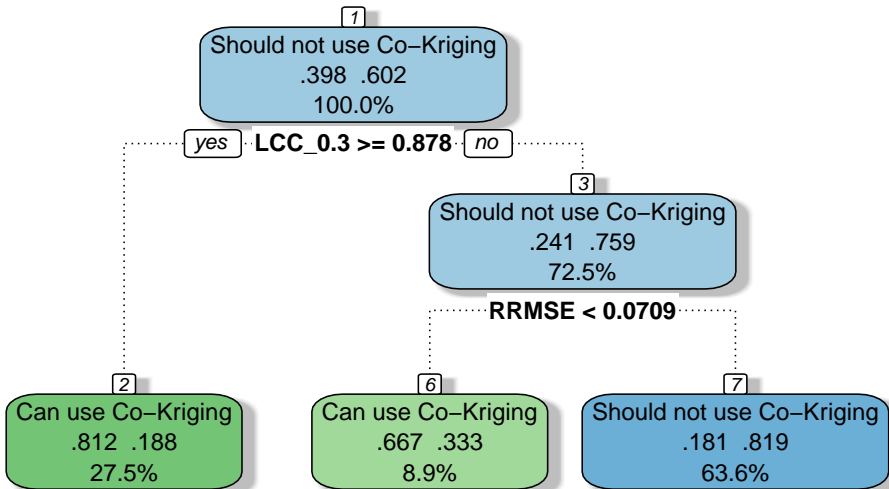

Supplement: ijoc.2022.1217.cd.zip [file augmentedTestSuite_(3)-allFeatures-minPercentage0.05-default-cp0.pdf › 2021.0299-master/data/plots/predictionPlots/augmentedTestSuite_(3)-allFeatures-minPercentage0.05-default-cp0.pdf]

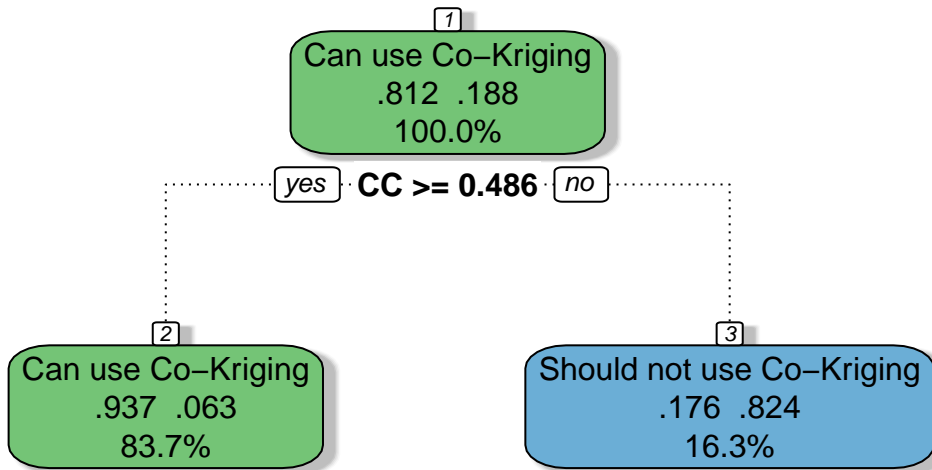

Supplement: ijoc.2022.1217.cd.zip [file literatureTestSuite_(1)-CC_only-minPercentage0.05-default-cp0.pdf › 2021.0299-master/data/plots/predictionPlots/literatureTestSuite_(1)-CC_only-minPercentage0.05-default-cp0.pdf]



Supplement: ijoc.2022.1217.cd.zip [file literatureTestSuite_(3)-allFeatures-minPercentage0.05-default-cp0.pdf › 2021.0299-master/data/plots/predictionPlots/literatureTestSuite_(3)-allFeatures-minPercentage0.05-default-cp0.pdf]
